# Supplementary material
Source: PubMed Central journal article supplement (PMC11331298)
Supplement: NIHPP2024.07.05.602304V2-supplement-1.pdf [file NIHPP2024.07.05.602304V2-supplement-1.pdf]

| ID | NAME                 |
|----|----------------------|
| 1  | Pvalb.C1ql1          |
| 2  | Id2.Sfrp2            |
| 3  | Sst.Atp2b4           |
| 4  | Slc17a8_Sst.Ncam2    |
| 5  | Sst.Spon1            |
| 6  | Pvalb.Tac1           |
| 7  | Pvalb.Gfra1          |
| 8  | Sst.Rbp4             |
| 9  | Sst.Grm1             |
| 10 | Sst.Pcdh11x          |
| 11 | Cplx3.Rxfp1          |
| 12 | Cplx3.Tox            |
| 13 | Id2.Tac1             |
| 14 | Id2.Bcl11b           |
| 15 | Id2.Prir             |
| 16 | Htr3a.Nnat           |
| 17 | Chat_Htr3a.Chat      |
| 18 | Htr3a.Phlda1         |
| 19 | Htr3a.Efna5          |
| 20 | Htr3a.Cpne5          |
| 21 | Htr3a.Ecel1          |
| 22 | Htr3a.Ibsp           |
| 23 | Htr3a.Krt73          |
| 24 | Slc17a8_Htr3a.Kctd12 |
| 25 | Htr3a.Chrm2          |
| 26 | Htr3a.Htr1b          |
| 27 | Htr3a.Sema3c         |

Supplemental Table 1: Key for neuron groups in Figure 1H

## Supplemental Figure 2

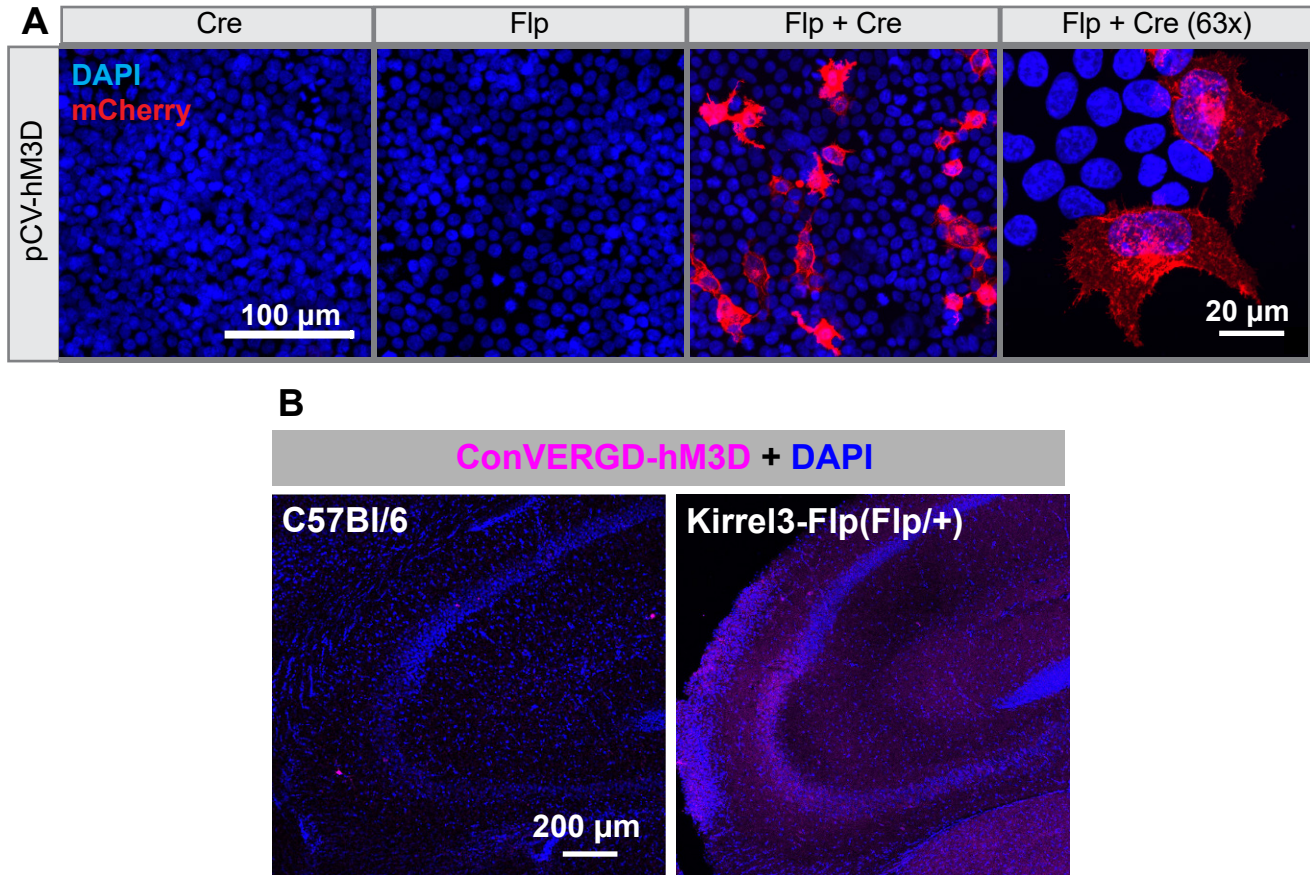

**Supplemental Figure 2.** A) Representative images of HEK293 cells co-transfected with hSyn-ConVERGD-hM3D-mCherry (pCV-hM3D) and either Cre, Flp, or Flp and Cre plasmids. Far right column: representative image at 63x, all other images taken at 20x. B) Representative hippocampal CA3 images of hSyn-ConVERGD-hM3D-mCherry AAV infection in wildtype C57Bl/6J and Kirrel3-Flp mice show no expression of the DREADD as expected.

### Supplemental Figure 3

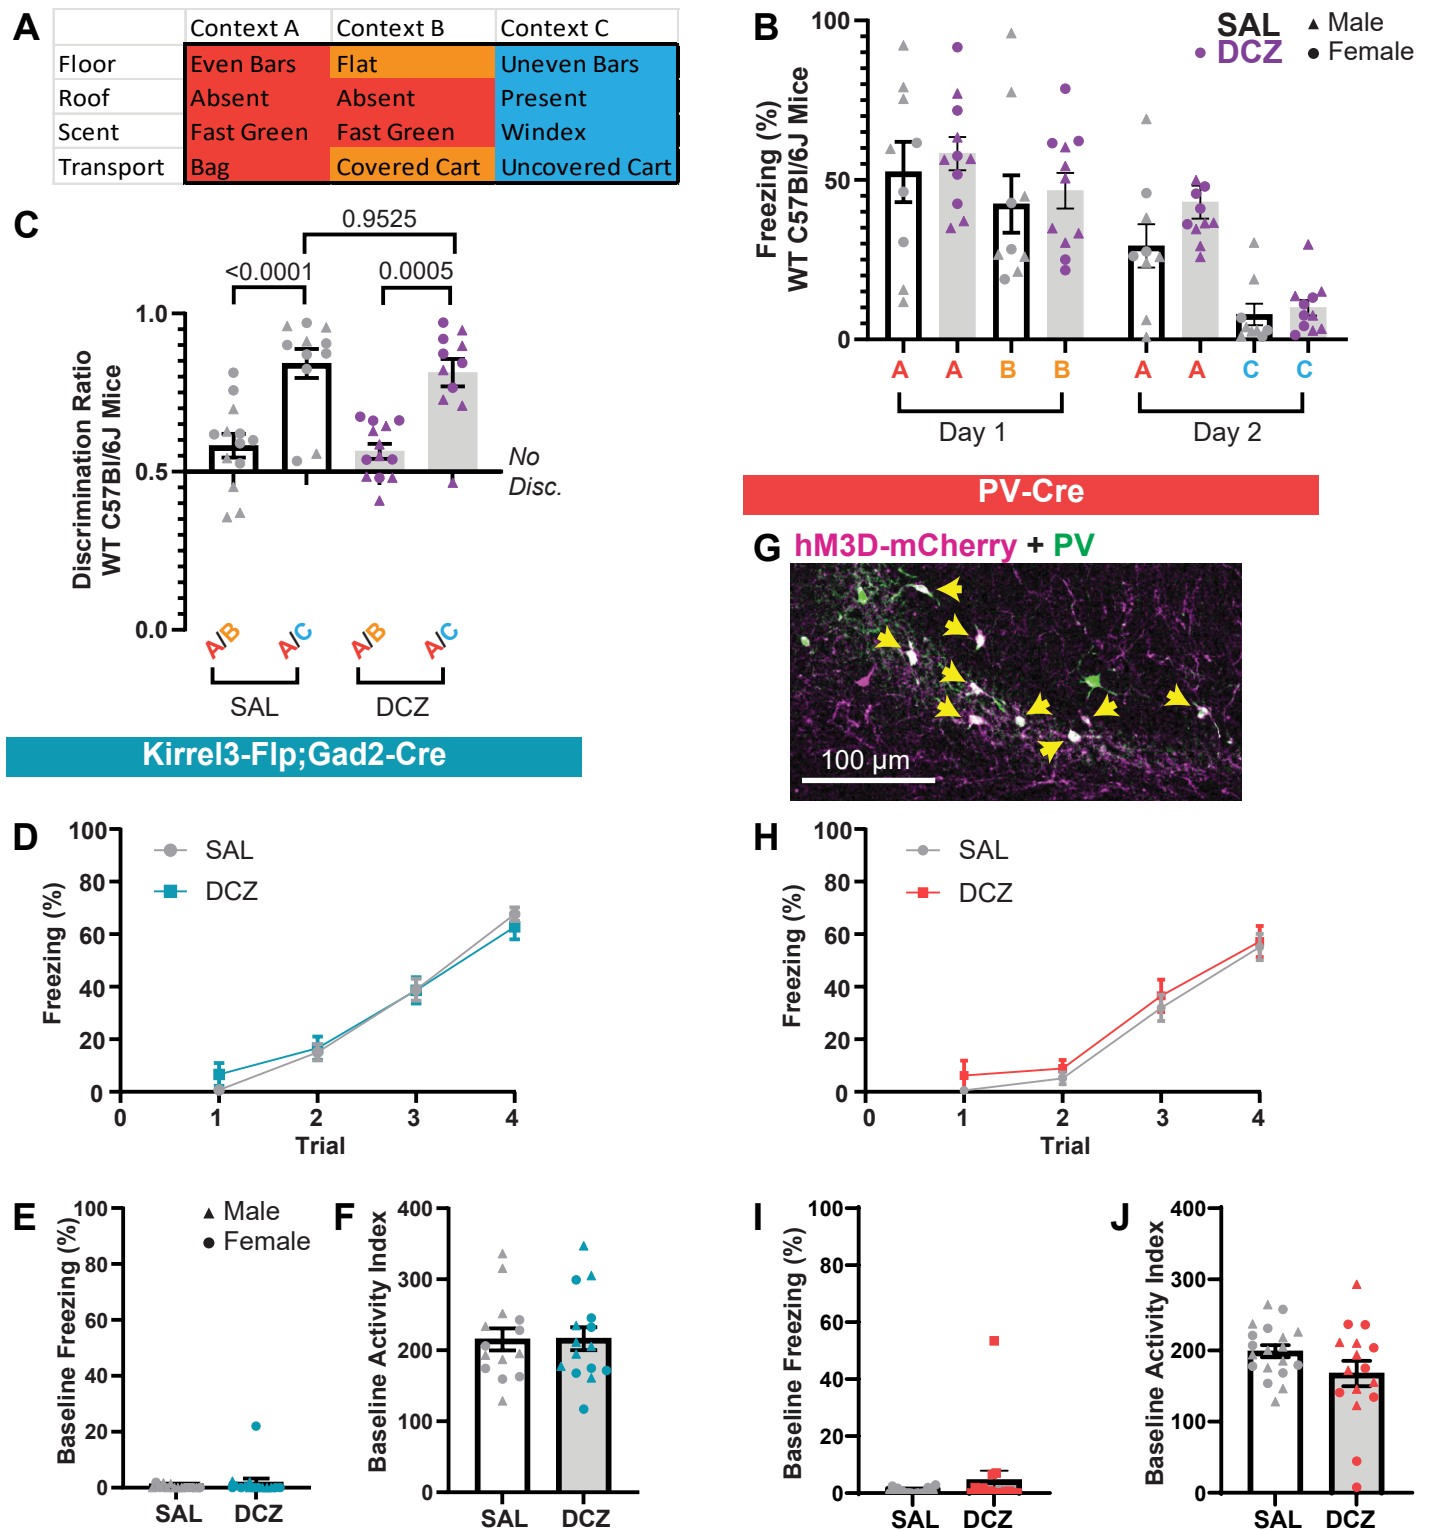

Supplemental Figure 3. A) Description of contextual cues between conditioning context A, similar context B, and neutral context C. B) Mouse behavior plotted as percent time spent freezing for wild-type (WT) mice when placed in indicated contexts after saline (gray) or DCZ (purple) injection. C) Time spent freezing (%) plotted as a discrimination ratio relative to context A for WT mice. 0.5 equals no discrimination. No differences between saline or DCZ,  $n = 13$  saline, 11 DCZ, ANOVA with multiple comparisons. D-F) Baseline metrics for Kirrel3-Flp;Gad2-Cre mice expressing CV-hM3D in Figure 3. D) % time spent freezing 30 sec before indicated shock trial. E) Baseline freezing and F) activity index prior to foot shock. G-J) Data for PV-Cre mice expressing Cre-dependent hM3D-mCherry Figure 3. G) Representative image of a hippocampal section from a PV-Cre mouse expressing hM3D-mCherry (magenta) and stained with anti-PV antibodies (green). Arrowheads (yellow) point to overlap (white). H) Same as D for PV-Cre mice. I) Activity index and J) activity index prior to foot shock. Error bars represent SEM.

## Supplemental Figure 4

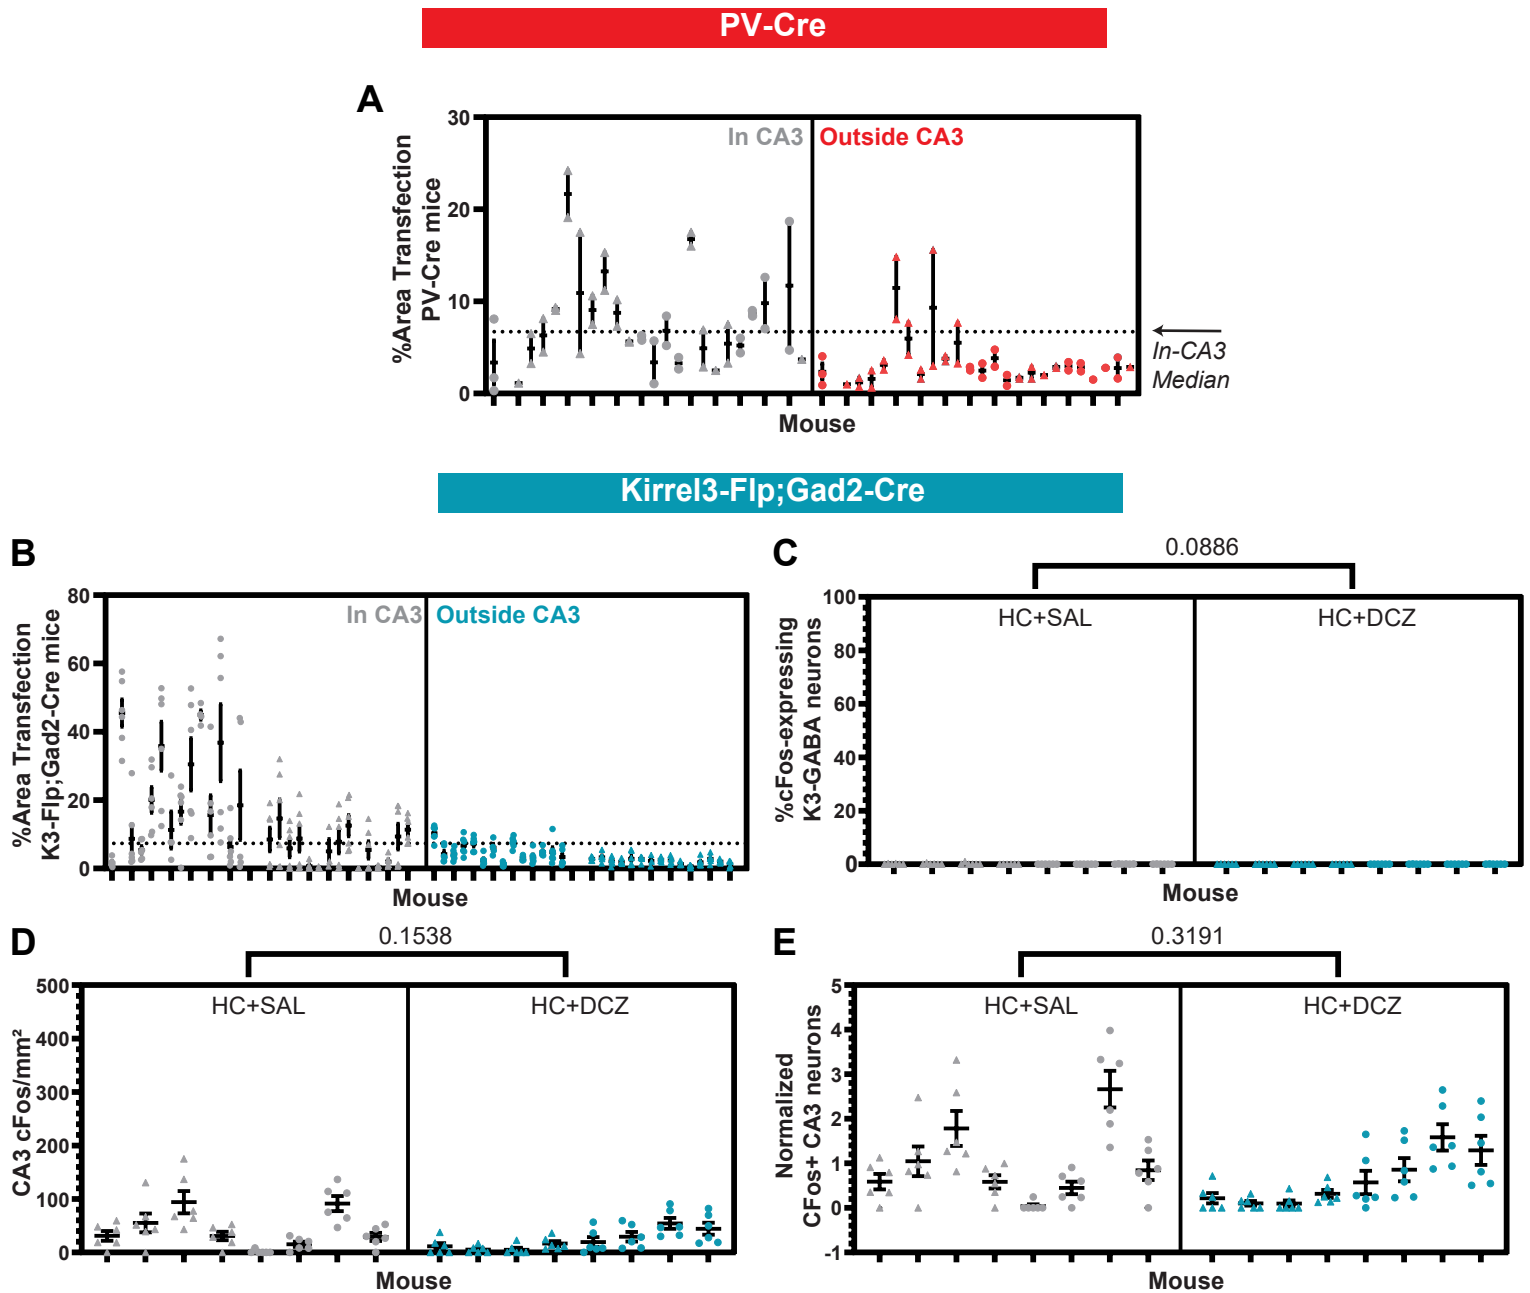

Supplemental Figure 4. cFos expression is low in K3-Flp; Gad2-Cre mice taken directly from their homecage. A) Plot indicating the percent area of hM3D-mCherry signal in CA3 versus outside CA3 to measure transfection efficacy for PV-Cre mice. Each dot represents a brain section. The median value for “in CA3” is indicated by the dotted line,  $n = 24$ . B-E) Data from brain sections of Kirrel3-Flp; Gad2-Cre mice transfected with CV-hM3D virus. B) Same as A,  $n = 29$ . Error bars represent SEM. C) % of K3-GABA neurons that are cFos positive after saline (SAL, grey) and DCZ injection (blue) of mice in homecage (HC). D) Number of cFos-positive CA3 neurons per mm<sup>2</sup> for saline and DCZ treated mice in HC. E) Number of cFos-positive CA3 neurons per mm<sup>2</sup> normalized to saline for both saline and DCZ treated mice in homecage. Nested t-test,  $n = 8$  per group.
